# Supplementary material for: The Importance of Stem Photosynthesis for Two Desert Shrubs Across Different Groundwater Depths
Source: Frontiers journal article supplement (doi:10.3389/fpls.2022.804786), 2022-03-10
Supplement: Data_Sheet_1.pdf [file Data_Sheet_1.pdf]

## Supplemental files

**Table S1** Comparison of leaf and stem water use efficiency under different groundwater depth

|                       | <i>Site</i> | $WUE_{leaf}$ | $WUE_{stem}$ |
|-----------------------|-------------|--------------|--------------|
| <i>H. ammodendron</i> | 1           | 7.94 (1.26)  | 14.98 (2.53) |
|                       | 2           | 3.96 (0.34)  | 13.07 (1.63) |
| <i>H. persicum</i>    | 1           | 5.11 (0.78)  | 7.91 (0.88)  |
|                       | 2           | 4.48 (0.45)  | 22.61 (4.93) |

*Site 1*: shallow groundwater depth, *Site 2*: deeper groundwater depth. The value in parentheses was represented SE

(n=18).

**Fig. S1**

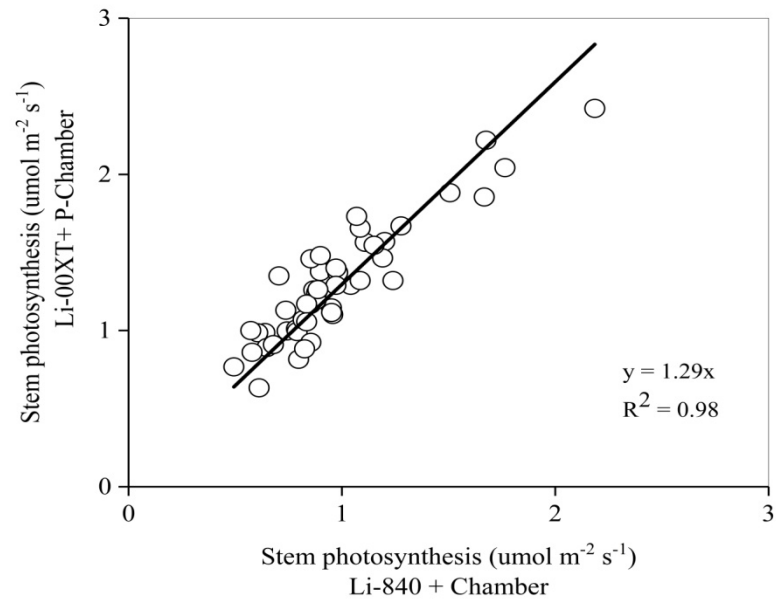

**Fig. S1** Relationship of stem photosynthesis measured between Li-840 + Chamber and Li-6400XT + P-Chamber in 2020-2021 growing season

**Fig. S2**

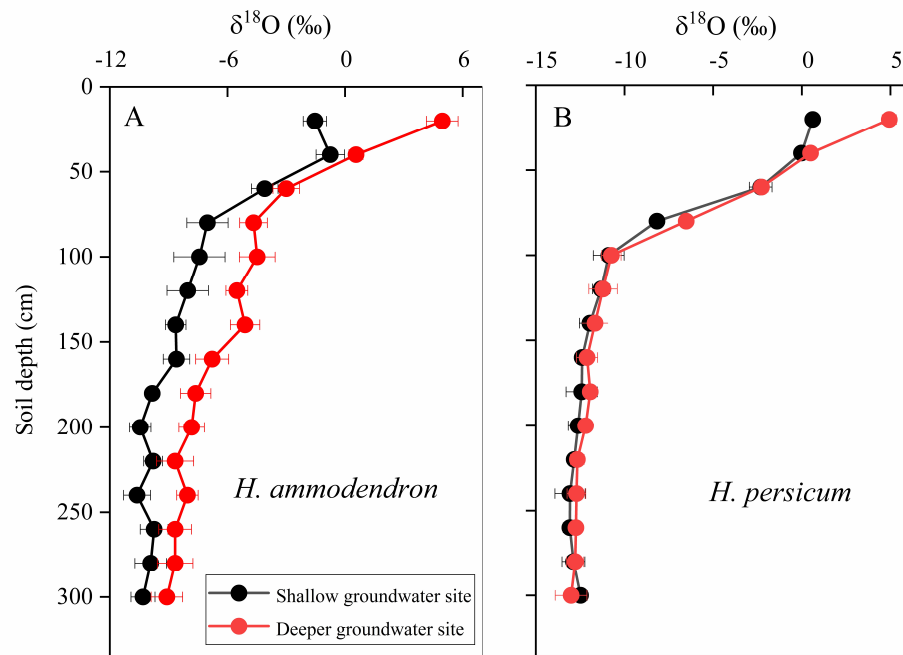

**Fig. S2** The  $\delta^{18}\text{O}$  values of soil water for *H. ammodendron* and *H. persicum* at two groundwater sites. Error bars represent the standard errors of the mean (n=3).
